# Supplementary material for: Establishment and Characterization of the First Chinese National Standard for Nucleic Acid Amplification Technology Assays for Hepatitis E Virus Nucleic Acid Detection
Source: MDPI journal article supplement (doi:10.3390/pathogens12101195), 2023-09-26
Supplement: s1 [file s1]

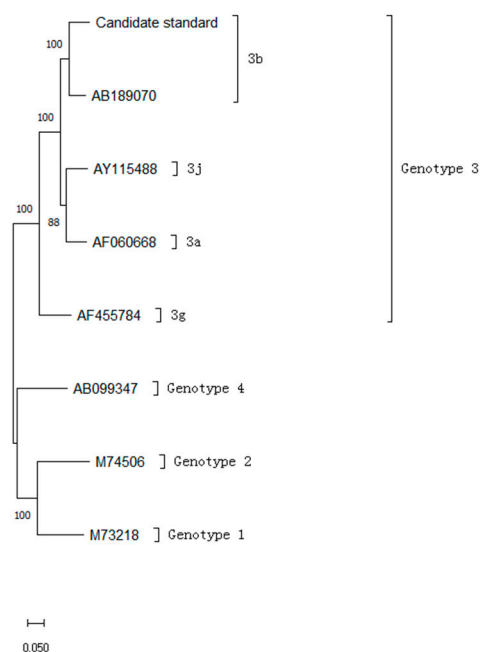

**Supplementary Figure S1.** Phylogenetic trees representing the genotype of candidate standard. Bootstrap values which were less than 70% were not shown. The ORF2 regions of the sequences were compared and shown.

**Supplementary Table S1.** Accuracy and precision of methods in different laboratories.

| Test                                 | Lab 1                        | Lab 2                        | Lab 3                        | Lab 4                        |
|--------------------------------------|------------------------------|------------------------------|------------------------------|------------------------------|
| 1                                    | 3.94 log <sub>10</sub> IU/mL | 3.80 log <sub>10</sub> IU/mL | 3.90 log <sub>10</sub> IU/mL | 3.95 log <sub>10</sub> IU/mL |
| 2                                    | 3.91 log <sub>10</sub> IU/mL | 3.80 log <sub>10</sub> IU/mL | 3.97 log <sub>10</sub> IU/mL | 3.98 log <sub>10</sub> IU/mL |
| 3                                    | 3.98 log <sub>10</sub> IU/mL | 3.80 log <sub>10</sub> IU/mL | 3.94 log <sub>10</sub> IU/mL | 3.98 log <sub>10</sub> IU/mL |
| Accuracy (%)                         | 103.8                        | 100.0                        | 103.6                        | 104.5                        |
| Relative standard deviation (RSD, %) | 0.9                          | 0.0                          | 0.9                          | 0.4                          |
